# Supplementary material
Source: PubMed Central journal article supplement (PMC7893701)
Supplement: ar0c00739_si_001.pdf [file ar0c00739_si_001.pdf]

# Supporting Information

## Oriented Attachment: From Natural Crystal Growth to a Materials Engineering Tool

Bastiaan B.V. Salzmann<sup>†‡</sup>, Maaike M. van der Sluijs<sup>†‡</sup>, Guiseppe Soligno<sup>†</sup> and Daniel Vanmaekelbergh<sup>†\*</sup>

<sup>†</sup>Condensed Matter and Interfaces, Debye Institute for Nanomaterials Science, Utrecht University, P.O. Box 80000, 3508 TA, Utrecht, The Netherlands. <sup>‡</sup>These authors contributed equally.

\*Corresponding author: [d.vanmaekelbergh@uu.nl](mailto:d.vanmaekelbergh@uu.nl)

### Contents

- S1: Oriented attachment as an alternative crystal growth process in aqueous solvents
- Table S1: Overview of reports on oriented attachment of charge-stabilized crystals in polar solvents
- Table S2: Overview of reports on oriented attachment in organic non-polar solvents

## **S1: Oriented attachment as an alternative crystal growth process in aqueous solvents**

*General:* Oriented attachment of charge-stabilized crystals in aqueous solvents is of interest in the research on biominerals, geology, materials science, and of course for crystallography itself. A selection of reports from this millennium are presented in the supplementary information, Table S1 and Table S2. Commonly, crystal growth by oriented attachment is coined non-classical crystal growth<sup>1</sup>, to distinguish it from the classical atom-by-atom (molecule-by-molecule) growth of crystals. Oriented attachment between crystals is observed in natural biological conditions and is assumed to be important for biomineral formation.<sup>1-4</sup> Oriented attachment of hydroxyapatite ( $\text{Ca}_5(\text{PO}_4)_3(\text{OH})$ ) and calcium carbonate ( $\text{CaCO}_3$ ) crystals has been studied to understand bone formation and bio-skeletons. Analytical studies of oriented attachment are partially impeded by the existence of a plethora of crystal polymorphs for these compounds. For relatively stable crystals consisting of for example  $\text{TiO}_2$ ,  $\text{SnO}_2$ , magnetite, hematite, and  $\text{ZnO}$ , the crystal formation by oriented attachment is enhanced by so called “hydrothermal coarsening”, which means high temperatures and pressures applied in an autoclave.<sup>5-9</sup> Crystals of Fe-oxide compounds (magnetite, hematite) are of interest from a geological perspective and magnetism as well.

The common scientific questions are related to the driving force for oriented attachment, the type of crystallographic facets involved, the precise mechanism on an atomic scale, the origin of defects in crystals such as twinning planes, edge- and screw dislocations.<sup>1</sup> In a minority of cases the crystals formed by oriented attachment under hydrothermal aging are considered as building blocks of technological interest, for instance in opto-electronics (solar cells).<sup>10, 11</sup>

*Driving forces and facet specificity:* Sols in water are stable due to the electrical double layer around the crystals; with one type of charges on the crystal surface counteracted by a diffuse layer of countercharge. Regarding the facet specificity, one can imagine that the density of

charges on the crystals can depend on the chemical surface termination of specific facets. For a number of crystals, the surface energy or crystal/liquid interfacial energy per unit area is understood to a certain extent; in reports one finds the notions of higher – and lower -energy surfaces.<sup>10, 12-14</sup> The energy lowered by crystal attachment will be strongest if two high-energy facets are eliminated by connection. Often, strong adsorption of H<sub>2</sub>O to specific facets can be a factor that decides which facets are involved in the epitaxial connection between crystals during hydrothermal coarsening. Frequently oriented attachment between charge-stabilized crystals has been observed when the temperature is raised above room temperature, described in the literature as *hydrothermal treatment*<sup>2, 9, 12, 13, 15-17</sup>; this means that Brownian motion of the dispersed crystals becomes so vivid that the protecting charge double layer breaks up in a collision, and facets face each other on a short distance. The increase of oriented attachment by raising the temperature is thus mostly a kinetic effect.

One of the best studied cases is oriented attachment of anatase TiO<sub>2</sub> nanocrystals. Penn et al.<sup>12</sup> reported oriented attachment via the high energy (001) and (112) facets. Adachi et al.<sup>10</sup> showed that these facets can be blocked by certain ligands, and that oriented attachment then occurs via lower energy facets. During hydrothermal coarsening it is often found that nanocrystals attach to form rods, mostly with the polar facets involved. In a second stage these rods adhere along their long direction and finally attach to form sheets or 3D materials, either fully closed or with pores present. Hierarchical construction of porous materials for optoelectronic applications and energy storage is an interesting engineering pathway, provided that the building blocks as well as the facet selectivity in the attachment can be precisely controlled.

*The study of crystal defects and annealing of crystal defects:* Crystal defects originating from imperfect oriented attachment have been studied by ex-situ high resolution transmission electron microscopy (HRTEM). An early study of TiO<sub>2</sub> showed that twinning planes in a crystal, and edge and screw dislocations can be caused by imperfect oriented attachment.<sup>12, 18</sup>

The presence of crystal defects constituted the first strong indication that oriented attachment is a prominent mechanism of crystal growth, abundant in natural and laboratory conditions. Twinning can occur when identical crystallographic facets face each other and attach, sharing the same crystal lattice points between them. An edge dislocation results from an atomic plane that ends halfway between the two planes that connect; a screw dislocation is more intricate to understand. Later on, the annealing of defects has been monitored in time under two types of conditions: (i) in the vacuum and beam conditions of an electron microscope<sup>19</sup>, (ii) with special samples containing ultra-thin films of nanocrystals and the liquid medium.<sup>20-22</sup>

**Table S1. Overview of reports on oriented attachment of charge-stabilized crystals in water or polar solvents**

| Compound         | Reference | Building blocks<br>- crystal structure<br>- shape<br>- size<br>- active facet                                                                                                       | Solvent, ligands (?),<br>and experimental<br>conditions                                                        | Type of crystals<br>formed by oriented<br>attachment                                                                                                                                                                       | Scientific interest                                                                                                                                                                     | Application                                                                                                                  |
|------------------|-----------|-------------------------------------------------------------------------------------------------------------------------------------------------------------------------------------|----------------------------------------------------------------------------------------------------------------|----------------------------------------------------------------------------------------------------------------------------------------------------------------------------------------------------------------------------|-----------------------------------------------------------------------------------------------------------------------------------------------------------------------------------------|------------------------------------------------------------------------------------------------------------------------------|
| TiO <sub>2</sub> | 18        | Anatase nanocrystals,<br>- multi-faceted<br>- 5 nm<br>- active facets: high energy<br>facets (112), (001)                                                                           | Water, hydrothermal<br>coarsening                                                                              | Larger crystals formed<br>from two or more<br>nanocrystals                                                                                                                                                                 | Understanding the<br>formation of edge- and<br>screw dislocations formed<br>by imperfect oriented<br>attachment                                                                         | Fundamental<br>knowledge                                                                                                     |
| TiO <sub>2</sub> | 12        | Preformed nanocrystals<br>- anatase, brookite<br>- multi-faceted<br>- 5 nm<br>- active (112) and (001)<br>facets                                                                    | Water, hydrothermal<br>coarsening                                                                              | Larger crystals with<br>epitaxial connections<br>and twinned interfaces                                                                                                                                                    | Understanding twinning<br>and polytypism in crystal<br>growth                                                                                                                           | Fundamental<br>knowledge                                                                                                     |
| TiO <sub>2</sub> | 10        | - preformed anatase<br>nanocrystals<br>- few nm in size<br>- high energy (001) facet<br>covered with surfactants,<br>(101) active                                                   | Polar solvent                                                                                                  | Anatase nanowires<br>along the <101><br>direction by (101) facet<br>attachment, different<br>from Penn et al.                                                                                                              | Understanding the type of<br>facets used in oriented<br>attachment                                                                                                                      | Assemblies of<br>attached TiO <sub>2</sub><br>rods as high-<br>surface area<br>material for<br>dye-sensitized<br>solar cells |
| TiO <sub>2</sub> | 7         | Ti(IV)Oxides → fibers →<br>branched rutile meso-<br>crystals via oriented<br>attachment                                                                                             | Acidic water                                                                                                   | - rutile fibers with c-<br>axis as long axis<br>- more complex and<br>larger crystals with<br>attachment via the<br>lateral (110) facets                                                                                   | Hierarchical assembly and<br>oriented attachment on<br>different stages of the<br>hydrothermal coarsening                                                                               | --                                                                                                                           |
| TiO <sub>2</sub> | 23        | TiO <sub>2</sub> nanocrystals,<br>anatase, charge-stabilized in<br>water<br>Atomistic simulations of<br>attachment                                                                  | Water and salts                                                                                                | Larger crystals with<br>attachment via (112)<br>facets, and (001) and<br>(100) facets: single<br>crystals and twinned<br>crystals                                                                                          | Understanding facet-<br>selectivity in OA of<br>anatase NCs, charge-<br>stabilized: attractive<br>interactions between<br>double layers, water<br>molecules on facets can<br>prevent OA | --                                                                                                                           |
| TiO <sub>2</sub> | 24        | Synthesis in autoclave<br>starting from Ti-<br>isopropoxide, trimethyl<br>ammonium hydroxide<br>resulting in TiO <sub>2</sub><br>nanocrystals, anatase, (001)<br>high energy facets | Autoclave, water, 230<br>°C                                                                                    | - anatase nanorods<br>along <001>,<br>attachment via high-<br>energy (001) facets<br>- further ripening to<br>ellipsoids                                                                                                   | --                                                                                                                                                                                      | Anode<br>material for<br>quantum dot-<br>sensitized<br>cells                                                                 |
| TiO <sub>2</sub> | 25        | TiCl <sub>4</sub> and H <sub>2</sub> O                                                                                                                                              | Atomic layer<br>deposition on a<br>graphene crystal, 300<br>°C                                                 | Anatase rods and V-<br>shaped structures in<br>alignment with<br>underlying graphene<br>crystal                                                                                                                            | Understanding non-typical<br>ALD growth: formation of<br>small flat NCs that move<br>along the surface,<br>coalescence, restructuring<br>and rod crystallization                        | --                                                                                                                           |
| TiO <sub>2</sub> | 26        | Ti(IV) complex and water                                                                                                                                                            | Water, hydrothermal.<br>Coarsening                                                                             | - primary 6 nm<br>elongated NCs with<br><001> as long direction<br>- spindle-like large<br>structures (500 nm) with<br>pores formed by<br>oriented attachment of<br>primary NCs along<br>(001) direction and<br>sides ways | Understanding<br>hierarchical growth                                                                                                                                                    | Anode<br>material for<br>Na-ion battery                                                                                      |
| SnO <sub>2</sub> | 13        | Preformed SnO <sub>2</sub><br>nanocrystals:<br>- nearly spherical, 1-2 nm,<br>multi-faceted<br>- charge stabilized<br>- (100) facets lowest in<br>energy                            | Water, coagulation at<br>isoelectric point,                                                                    | Disordered rods of a<br>few attached<br>nanocrystals                                                                                                                                                                       | Understanding the effect<br>of Brownian motion vs.<br>nanocrystal alignment by<br>facet/facet interactions                                                                              | --                                                                                                                           |
| SnO <sub>2</sub> | 27        | SnCl <sub>2</sub> in water/ethanol<br>mixture<br>Endured aging at 120 °C                                                                                                            | Water/ethanol                                                                                                  | Disordered sheets,<br>rutile, non-<br>stoichiometric                                                                                                                                                                       | Understanding sheet<br>formation in one pot-<br>synthesis, small NCs as<br>intermediates                                                                                                | Li battery                                                                                                                   |
| SnO <sub>2</sub> | 28        | Sn(citrate) <sub>2</sub> and<br>manganese(citrate) <sub>2</sub> heating<br>up to 500 °C results in NCs,<br>truncated octahedrons                                                    | Nanocrystals formed<br>in polar solvent,<br>oriented attachment<br>performed under dry<br>conditions at 700 °C | 2D/3D disordered<br>agglomerates, Mn <sup>2+</sup> ions<br>at facets impede or slow<br>down oriented<br>attachment                                                                                                         | HR TEM study of<br>facet/facet connections in<br>NC clusters with strong<br>misalignment                                                                                                | --                                                                                                                           |

**Table S1. Overview of reports on oriented attachment of charge-stabilized crystals in water or polar solvents (continued)**

| Compound                                                                | Reference | Building blocks<br>- crystal structure<br>- shape<br>- size<br>- active facet                                                                                                                      | Solvent, ligands (?),<br>and experimental<br>conditions                 | Type of crystals<br>formed by oriented<br>attachment                                                                                                                                                                   | Scientific interest                                                                                                                                                                                                                                   | Application                                                  |
|-------------------------------------------------------------------------|-----------|----------------------------------------------------------------------------------------------------------------------------------------------------------------------------------------------------|-------------------------------------------------------------------------|------------------------------------------------------------------------------------------------------------------------------------------------------------------------------------------------------------------------|-------------------------------------------------------------------------------------------------------------------------------------------------------------------------------------------------------------------------------------------------------|--------------------------------------------------------------|
| SnO <sub>2</sub>                                                        | 29        | - NCs in water<br>- 5 nm                                                                                                                                                                           | Basic water,<br>coarsening for several<br>days                          | - Nanocrystals attach to<br>wires <112> direction<br>- Wires attach via their<br>sizes to sheets and 3D<br>crystals                                                                                                    | - Understanding of<br>hierarchical steps in<br>crystal formation via<br>oriented attachment on<br>several stages                                                                                                                                      | --                                                           |
| SnO <sub>2</sub>                                                        | 14        | - SnCl <sub>2</sub> in water at very high<br>pressure → elongated<br>monodisperse<br>dodecahedrons 200 nm,<br>- active (100), (110) facets<br>in OA, (111) facets<br>protected by NMe <sub>3</sub> | Water, autoclave, 220<br>°C, very high pressure                         | 3D very well-ordered<br>structures, with<br>attachment mostly via<br>(100) facets                                                                                                                                      | - Understanding crystal<br>growth under high<br>pressure<br>- Understanding assembly<br>of large monodisperse<br>crystals into ordered<br>superstructures under high<br>pressure                                                                      | --                                                           |
| CaCO <sub>3</sub>                                                       | 30        | CaCl <sub>2</sub> , NH <sub>4</sub> Cl, CO <sub>2</sub> in water                                                                                                                                   | --                                                                      | Ca <sup>2+</sup> ions → amorphous<br>CaCO <sub>3</sub> → vaterite<br>(100) terminated sheets<br>(>100nm) stabilized<br>with NH <sub>4</sub> <sup>+</sup> → stacks →<br>3-D calcite by OA                               | Biom mineralization via<br>intermediate steps in<br>which OA is important                                                                                                                                                                             | --                                                           |
| CaCO <sub>3</sub>                                                       | 3         | Ca(OH) <sub>2</sub> + CO <sub>2</sub> → 30-50<br>nm truncated nanocubes,<br>with (104) facets                                                                                                      | Water, room<br>temperature                                              | Linear structures and<br>multi-branched 2D and<br>3D aggregates by OA of<br>the nanocubes                                                                                                                              | Understanding interaction<br>between charged facets<br>(Ca <sup>2+</sup> , CO <sub>3</sub> <sup>2-</sup> terminated) in<br>biomineralization                                                                                                          | --                                                           |
| CaCO <sub>3</sub>                                                       | 31        | Rod-like structures formed<br>from NCs (see above)                                                                                                                                                 | Water                                                                   | Lateral attachment of<br>rods forming bundles                                                                                                                                                                          | Attachment directed by<br>surface charge                                                                                                                                                                                                              | --                                                           |
| Ca <sub>5</sub> (PO <sub>4</sub> ) <sub>3</sub> (OH),<br>hydroxyapatite | 2         | Amorphous particles and<br>nanocrystals                                                                                                                                                            | Water, hydrothermal<br>aging                                            | - Wurtzite nanorods<br>along polar c-axis, 5 nm<br>in diameter, 20-100 nm<br>in length<br>- Assemblies of oriented<br>nanorods                                                                                         | Understanding bone<br>formation with biomimetic<br>experiments                                                                                                                                                                                        | --                                                           |
| Fe <sub>3</sub> O <sub>4</sub><br>(magnetite)                           | 32        | Preformed 5 nm Fe <sub>3</sub> O <sub>4</sub><br>nanocrystals                                                                                                                                      | Polar solvent                                                           | Large porous spheres<br>100 nm in diameter<br>formed by OA of 5 nm<br>crystals                                                                                                                                         | Understanding oriented<br>attachment                                                                                                                                                                                                                  | --                                                           |
| Fe <sub>2</sub> O <sub>3</sub> (hematite)                               | 33        | 100 nm hematite<br>nanocrystals, with facets                                                                                                                                                       | Water, hydrothermal                                                     | - 1D chains and<br>extended hexagonal<br>monolayers and films<br>by OA of 100 nm<br>hematite NCs<br>- OA via (110) planes,<br>while (001) facets have<br>lowest surface energy                                         | - Understanding oriented<br>attachment of large<br>crystals in water<br>- Interplay of facet-<br>specific interactions and<br>magnetic dipoles                                                                                                        | Formation of<br>magnetic<br>materials                        |
| Fe <sub>2</sub> O <sub>3</sub> (e- and a-<br>phase)                     | 34        | Fe(NO <sub>3</sub> ) <sub>2</sub> in<br>water/(NH <sub>4</sub> ) <sub>2</sub> HPO <sub>4</sub>                                                                                                     | Hydrothermal reaction<br>at 200 °C in autoclave                         | - Primary nanocrystals:<br>e-Fe <sub>2</sub> O <sub>3</sub> 10-15 nm in<br>size<br>- Formation of<br>nanoflakes and<br>ellipsoid-shaped<br>structures, 200-500 nm<br>in size with a-crystal<br>structure, formed by OA | - Formation of e-Fe <sub>2</sub> O <sub>3</sub><br>nanocrystals with<br>beneficial magnetic<br>properties<br>- Slow decay of this phase<br>to large aggregates of<br>Fe <sub>2</sub> O <sub>3</sub> with smaller<br>coercitivity                      | --                                                           |
| FeO(OH)<br>goethite                                                     | 35        | Fe(OH) <sub>2</sub> in water + O <sub>2</sub>                                                                                                                                                      | Water                                                                   | - Nanorods by isotropic<br>crystal growth<br>- OA of rods via lateral<br>(110) facets to larger<br>crystalline rods (30 nm<br>in width, 200 nm in<br>length)                                                           | - Understanding the<br>formation of Goethite rods<br>via a hierarchical process                                                                                                                                                                       | --                                                           |
| ZnO                                                                     | 36        | Ligand-free NCs, 5 nm in<br>size                                                                                                                                                                   | Polar solvent aging of<br>the NCs in<br>MeOH/chloroform                 | Monodisperse nano-<br>porous ellipsoids, about<br>200 nm in length, 100<br>nm in width, 8 nm pores                                                                                                                     | Proof that mesoscopic 3D<br>systems can be formed by<br>OA in polar solvents                                                                                                                                                                          | Photocatalysis<br>photo -<br>degradation of<br>organic waste |
| ZnO                                                                     | 37        | One-pot synthesis, based on<br>Zn(acetate) <sub>2</sub> in ethanol, NCs<br>are intermediates in rod<br>formation                                                                                   | Water/Ethanol<br>Enduring<br>hydrothermal<br>coarsening in<br>autoclave | ZnO nanocrystals 1-3<br>nm diameter, ZnO<br>nanorods with <0001><br>wurtzite long axis, 15<br>nm in diameter, 100 nm<br>in length                                                                                      | Oriented attachment on<br>diverse hierarchical<br>moments in the<br>coarsening, during<br>formation of 7 nm<br>crystals, which then form<br>(15,100 nm) wurtzite rods<br>Axial oriented attachment<br>of small nanocrystals vs.<br>lateral attachment | --                                                           |

**Table S1. Overview of reports on oriented attachment of charge-stabilized crystals in water or polar solvents (continued)**

| Compound                                             | Reference | Building blocks<br>- crystal structure<br>- shape<br>- size<br>- active facet                                             | Solvent, ligands (?),<br>and experimental<br>conditions                                           | Type of crystals<br>formed by oriented<br>attachment                                                                                                   | Scientific interest                                                                                                                                                            | Application                                         |
|------------------------------------------------------|-----------|---------------------------------------------------------------------------------------------------------------------------|---------------------------------------------------------------------------------------------------|--------------------------------------------------------------------------------------------------------------------------------------------------------|--------------------------------------------------------------------------------------------------------------------------------------------------------------------------------|-----------------------------------------------------|
| ZnO                                                  | 9         | One pot synthesis based on hydrolysis of Zn(OH) <sub>2</sub> under hydrothermal conditions, ZnO NCs as intermediate phase | Water, sodium dodecyl sulfonate as ligand, presumable adsorbed at the lateral facets of the wires | ZnO nanowires along <0001> wurtzite axis, 20-80 μm, 50-200 nm diameter                                                                                 | Role of sodium dodecyl sulfonate ligands adsorbing at the lateral (100) facets, promoting stronger anisotropy                                                                  | Opto-electronic devices, sensitive UV photodetector |
| ZnO                                                  | 38        | Measurement of (0001) facet-to-facet forces by AFM                                                                        | Water                                                                                             | --                                                                                                                                                     | Understanding facet-to-facet forces as a function of distance (intervening water layers) and relative in-plane angle                                                           | --                                                  |
| BaTiO <sub>3</sub>                                   | 39        | - Multi-faceted BaTiO <sub>3</sub> NCs in water<br>- Cubic NCs in organic solvent, oleic acid capped                      | - Water, hydrothermal<br>- Organic solvents                                                       | Systems with a few nanocrystals attached, with alignment of the nanocrystals                                                                           | Model study based on results of two other reports, competition between van der Waals facet/facet interactions, and assembly directed by the NC dipole moment around the c-axis | --                                                  |
| MnS                                                  | 40        | Manganocene (Mn-C) and elemental sulfur                                                                                   | Dry mixture, autoclave, 500-800 °C                                                                | Porous mesoscopic carbon/MnS architectures by oriented attachment of MnS 200-400 nm crystals in the carbon support                                     | --                                                                                                                                                                             | Anode material for Li batteries                     |
| MnO <sub>2</sub>                                     | 41        | Structures with interconnected MnO <sub>6</sub> octahedra forming linear pores                                            | Monitoring oriented attachment of the building blocks in a liquid cell                            | - primary building blocks attach<br>- finally a nanowire with several pore-channels is formed                                                          | Peculiar crystal structures with molecular-like binding mechanisms                                                                                                             | --                                                  |
| Mn <sub>2</sub> O <sub>3</sub> ,<br>MnO <sub>2</sub> | 42        | Interconnected MnO <sub>6</sub> octahedra form hexagonal nanoflakes along a <100> direction                               | Water                                                                                             | Nanoflakes attach in imperfect way to form multi-domain nanoflower structures                                                                          | Understanding edge-to-edge oriented attachment of nanoflakes promoted by hydrogen bonds                                                                                        | --                                                  |
| CoO                                                  | 43        | CoCO <sub>3</sub> forms CoO nanorods in solvothermal conditions                                                           | Water                                                                                             | - Rods attach side-by-side to plates<br>- Plates attach to form book-like structures                                                                   | Understanding hierarchical OA using several facet types                                                                                                                        | Energy storage in super-capacitors                  |
| Au                                                   | 44        | Au NCs dispersed                                                                                                          | Water, laser-light in the near IR                                                                 | Hierarchical oriented attachment:<br>- NCs attach to form rods, - rods attach in length and laterally, - longer rods attach to form micron sized wires | Understanding hierarchical OA, driven by heating and plasmon resonances                                                                                                        | --                                                  |
| Au                                                   | 45        | Citrate-stabilized Au nanocrystals, 2 nm in size, multi-faceted                                                           | Water, liquid cell                                                                                | NC dimers attached via (111) facets                                                                                                                    | In-situ study of rotational motion of nanocrystals, and finally epitaxial connection                                                                                           | --                                                  |
| PbSe                                                 | 46        | Pb(CH <sub>3</sub> COO) <sub>2</sub> and Na <sub>2</sub> SeO <sub>3</sub><br>Chemical bath deposition of a GaAs wafer     | Water at pH = 13                                                                                  | Small cubic PbSe nanocrystals formed in solution, attach via (100)/(100) interactions to columns                                                       | Preparing electronic grade and quantized thin PbSe films                                                                                                                       | --                                                  |
| PbTiO <sub>3</sub><br>perovskite<br>fibers           | 17        | Pb(NO <sub>3</sub> ) <sub>2</sub> and Ti(OH) <sub>4</sub>                                                                 | Water, hydrothermal conditions                                                                    | PbTiO <sub>3</sub> nanorods that evolve into ribbons with diameters of 250 nm via lateral OA, using (110) planes                                       | Formation of high-quality crystalline ribbons, photoluminescence in visible region                                                                                             | --                                                  |

**Table S2: Overview of reports on oriented attachment in organic non-polar solvents**

| Compound                       | Reference | Building blocks<br>- crystal structure<br>- shape<br>- size<br>- active facet                                                 | Suspension,<br>ligand, method                                                         | Crystal formed by<br>oriented attachment                                                                                                                                                                                                                          | Scientific interest                                                                                                                                       | Application               |
|--------------------------------|-----------|-------------------------------------------------------------------------------------------------------------------------------|---------------------------------------------------------------------------------------|-------------------------------------------------------------------------------------------------------------------------------------------------------------------------------------------------------------------------------------------------------------------|-----------------------------------------------------------------------------------------------------------------------------------------------------------|---------------------------|
| PbSe                           | 47        | Nanocrystals<br>- rock salt<br>- truncated cube<br>- octahedron<br>- few nm<br>- (100) or (110) or (111) depending on ligands | Organic,<br>ligand-stabilized<br>nanocrystals                                         | - Direct synthesis of straight nanowires along $\langle 100 \rangle$ , 4-20 nm diameter, micrometre length<br>- Nanorods by oriented attachment of nanocrystals with use of:<br>(100) facets (oleates),<br>(110) facets (amines)<br>(111) facets (hexadecylamine) | Study of active facet selectivity depending on the ligand stabilization, strong anisotropy with centrosymmetric crystal structure                         | Opto-electronic materials |
| PbSe                           | 48        | - One-pot synthesis with Pb- and Se-precursors<br>- 5 nm PbSe nanocube intermediates                                          | Organic                                                                               | - PbSe nanowires formed by O'A attachment of 5 nm nanocrystal intermediates aligned along a $\langle 100 \rangle$ direction<br>- Liquid crystals of aligned nanorods                                                                                              | - study of anisotropic crystal growth with centrosymmetric rock salt crystal structure                                                                    | Opto-electronics          |
| PbS                            | 49        | - One-pot synthesis, PbS nanocrystals as intermediates, dense packing of oleates on (100) planes                              | Organic, Cl-containing co-solvent                                                     | - Extended ( $\mu\text{m}$ ) 2D sheets, 5 nm in thickness, OA attachment of nanocrystals, presumably along the (110) direction                                                                                                                                    | - formation of 2D opto-electronic materials by wet chemistry                                                                                              | Opto-electronics          |
| Mn <sub>3</sub> O <sub>4</sub> | 50        | - Autoclave synthesis in water of 20-30 nm truncated cuboids<br>- 6 (100) facets<br>- oleic acid capped                       | Hexane and toluene, solvent evaporation, NC assembly at liquid/air interface, heating | - Linear rods $\langle 100 \rangle$ direction, with epitaxial connection via the (100) facets<br>- Square monolayers with attachment at 4 (100) facets                                                                                                            | - Understanding assembly of capped nanocubes at organic liquid/air interface, OA upon removal of oleic acid                                               | --                        |
| ZnS                            | 51        | Nanocrystals<br>- zinc blende<br>- multi-faceted<br>- 5 nm                                                                    | Organic solvents,<br>oleic acid,<br>hexadecylamine                                    | - Direct synthesis of nanorods of 5nm diameter, 20 nm length<br>- Oriented attachment of nanocrystals to rods                                                                                                                                                     | Facet-selective oriented attachment                                                                                                                       | Opto-electronic materials |
| CdSe                           | 52        | Direct one-pot synthesis, nanocrystals as intermediates                                                                       | Organic,<br>alkylamine ligands of different lengths                                   | - Direct synthesis of CdSe nanorods 1.5 – 6nm in diameter, via intermediate phases of pearl-necklace or string-of-pearls agglomerates                                                                                                                             | Understanding nanowire growth, via intermediate agglomeration, and OA                                                                                     | Opto-electronic materials |
| Au                             | 53        | Chloroauric acid and oleylamine (reductor) in a toluene medium                                                                | Organic solvents                                                                      | - Ionic precursors → Au nanocrystals 2 nm in size → Au nanowires with of 2 nm in diameter up to $\mu\text{m}$ , growth along the $\langle 111 \rangle$ axis<br>- Arrays of nanowires                                                                              | - Understanding anisotropic growth by OA of cubic fcc nanocrystals<br>- Formation of twin defects, and atomic reconfigurations, smoothening the nanowires | --                        |



## References

1. Niederberger, M.; Colfen, H., Oriented attachment and mesocrystals: Non-classical crystallization mechanisms based on nanoparticle assembly. *Physical Chemistry Chemical Physics* **2006**, *8*, 3271-3287.
2. Chen, J. D.; Wang, Y. J.; Wei, K.; Zhang, S. H.; Shi, X. T., Self-organization of hydroxyapatite nanorods through oriented attachment. *Biomaterials* **2007**, *28*, 2275-2280.
3. Takasaki, M.; Kimura, Y.; Yamazaki, T.; Oaki, Y.; Imai, H., 1D oriented attachment of calcite nanocrystals: formation of single-crystalline rods through collision. *Rsc Advances* **2016**, *6*, 61346-61350.
4. Alivisatos, A. P., Perspectives: Biomineralization: Naturally aligned nanocrystals. *Science (Washington, D. C.)* **2000**, *289*, 736-737.
5. Liu, J.; Wei, A.-X.; Zhang, C.-X., Synthesis of Density-controllable TiO<sub>2</sub> Nanowire Bundle Arrays and Their Application in Quantum Dot Sensitized Solar Cell. *Journal of Inorganic Materials* **2013**, *28*, 639-643.
6. Gao, H.; Sui, X.; Dai, D.; Si, C.; Liu, G., Hierarchical Honeycomb Anatase TiO<sub>2</sub> with (100) Facet: Facile Hydrothermal Preparation and Enhanced Photocatalytic Performance. *Journal of Nanoscience and Nanotechnology* **2015**, *15*, 5193-5197.
7. Jordan, V.; Javornik, U.; Plavec, J.; Podgornik, A.; Recnik, A., Self-assembly of multilevel branched rutile-type TiO<sub>2</sub> structures via oriented lateral and twin attachment. *Scientific Reports* **2016**, *6*.
8. Sun, Y.; Ndifor-Angwafor, N. G.; Riley, D. J.; Ashfold, M. N. R., Synthesis and photoluminescence of ultra-thin ZnO nanowire/nanotube arrays formed by hydrothermal growth. *Chemical Physics Letters* **2006**, *431*, 352-357.
9. Wang, J.; Li, X.; Teng, C. J.; Xia, Y.; Xu, J. L.; Xie, D.; Xiang, L.; Komarneni, S., Ligand-directed rapid formation of ultralong ZnO nanowires by oriented attachment for UV photodetectors. *Journal of Materials Chemistry C* **2016**, *4*, 5755-5765.
10. Adachi, M.; Murata, Y.; Takao, J.; Jiu, J.; Sakamoto, M.; Wang, F., Highly efficient dye-sensitized solar cells with a titania thin-film electrode composed of a network structure of single-crystal-like TiO<sub>2</sub> nanowires made by the "oriented attachment" mechanism. *J Am Chem Soc* **2004**, *126*, 14943-9.
11. Zhu, L. Z.; Richardson, B. J.; Yu, Q. M., Anisotropic Growth of Iron Pyrite FeS<sub>2</sub> Nanocrystals via Oriented Attachment. *Chemistry of Materials* **2015**, *27*, 3516-3525.
12. Penn, R. L.; Banfield, J. F., Oriented attachment and growth, twinning, polytypism, and formation of metastable phases; insights from nanocrystalline TiO<sub>2</sub>. *American Mineralogist* **1998**, *83*, 1077-1082.
13. Lee, E. J. H.; Ribeiro, C.; Longo, E.; Leite, E. R., Oriented attachment: An effective mechanism in the formation of anisotropic nanocrystals. *Journal of Physical Chemistry B* **2005**, *109*, 20842-20846.
14. Wang, J.; Lian, G.; Si, H. B.; Wang, Q. L.; Cui, D. L.; Wong, C. P., Pressure-Induced Oriented Attachment Growth of Large-Size Crystals for Constructing 3D Ordered Superstructures. *Acs Nano* **2016**, *10*, 405-412.
15. Dalod, A. R. M.; Grendal, O. G.; Skjaervo, S. L.; Inzani, K.; Selbach, S. M.; Henriksen, L.; van Beek, W.; Grande, T.; Einarsrud, M. A., Controlling Oriented Attachment and in Situ Functionalization of TiO<sub>2</sub> Nanoparticles During Hydrothermal Synthesis with APTES. *J Phys Chem C* **2017**, *121*, 11897-11906.
16. Lavric, V.; Isopescu, R.; Maurino, V.; Pellegrino, F.; Pellutic, L.; Ortel, E.; Hodoroaba, V. D., A New Model for Nano-TiO<sub>2</sub> Crystal Birth and Growth in Hydrothermal Treatment Using an Oriented Attachment Approach. *Cryst Growth Des* **2017**, *17*, 5640-5651.

17. Zhao, R. Y.; Li, M.; Ren, Z. H.; Zhu, Y. H.; Han, G. R., Three-dimensional oriented attachment growth of single-crystal pre-perovskite PbTiO<sub>3</sub> hollowed fibers. *Crystengcomm* **2018**, *20*, 448-453.
18. Penn, R. L.; Banfield, J. F., Imperfect oriented attachment: Dislocation generation in defect-free nanocrystals. *Science* **1998**, *281*, 969-971.
19. van Huis, M. A.; Kunneman, L. T.; Overgaag, K.; Xu, Q.; Pandraud, G.; Zandbergen, H. W.; Vanmaekelbergh, D., Low-Temperature Nanocrystal Unification through Rotations and Relaxations Probed by in Situ Transmission Electron Microscopy. *Nano Letters* **2008**, *8*, 3959-3963.
20. Yuk, J. M.; Park, J.; Ercius, P.; Kim, K.; Hellebusch, D. J.; Crommie, M. F.; Lee, J. Y.; Zettl, A.; Alivisatos, A. P., High-resolution EM of colloidal nanocrystal growth using graphene liquid cells. *Science* **2012**, *336*, 61-4.
21. Hauwiler, M. R.; Frechette, L. B.; Jones, M. R.; Ondry, J. C.; Rotskoff, G. M.; Geissler, P.; Alivisatos, A. P., Unraveling Kinetically-Driven Mechanisms of Gold Nanocrystal Shape Transformations Using Graphene Liquid Cell Electron Microscopy. *Nano Lett* **2018**, *18*, 5731-5737.
22. Ondry, J. C.; Hauwiler, M. R.; Alivisatos, A. P., Dynamics and Removal Pathway of Edge Dislocations in Imperfectly Attached PbTe Nanocrystal Pairs: Toward Design Rules for Oriented Attachment. *ACS Nano* **2018**, *12*, 3178-3189.
23. Sushko, M. L.; Rosso, K. M., The origin of facet selectivity and alignment in anatase TiO<sub>2</sub> nanoparticles in electrolyte solutions: implications for oriented attachment in metal oxides. *Nanoscale* **2016**, *8*, 19714-19725.
24. Zhang, K.; Zhou, W.; Zhang, X.; Qu, Y.; Wang, L.; Hu, W.; Pan, K.; Li, M.; Xie, Y.; Jiang, B.; Tian, G., Large-scale synthesis of stable mesoporous black TiO<sub>2</sub> nanosheets for efficient solar-driven photocatalytic hydrogen evolution via an earth-abundant low-cost biotemplate. *RSC Advances* **2016**, *6*, 50506-50512.
25. Grillo, F.; La Zara, D.; Mulder, P.; Kreutzer, M. T.; Ruud van Ommen, J., Oriented Attachment and Nanorod Formation in Atomic Layer Deposition of TiO<sub>2</sub> on Graphene Nanoplatelets. *J Phys Chem C Nanomater Interfaces* **2018**, *122*, 19981-19991.
26. Ling, L.; Bai, Y.; Wang, H.; Ni, Q.; Zhang, J.; Wu, F.; Wu, C., Mesoporous TiO<sub>2</sub> microparticles formed by the oriented attachment of nanocrystals: A super-durable anode material for sodium-ion batteries. *Nano Research* **2018**, *11*, 1563-1574.
27. Wang, D.; Li, X.; Wang, J.; Yang, J.; Geng, D.; Li, R.; Cai, M.; Sham, T.-K.; Sun, X., Defect-Rich Crystalline SnO<sub>2</sub> Immobilized on Graphene Nanosheets with Enhanced Cycle Performance for Li Ion Batteries. *The Journal of Physical Chemistry C* **2012**, *116*, 22149-22156.
28. Chang, C.-H.; Gong, M.; Dey, S.; Liu, F.; Castro, R. H. R., Thermodynamic Stability of SnO<sub>2</sub> Nanoparticles: The Role of Interface Energies and Dopants. *The Journal of Physical Chemistry C* **2015**, *119*, 6389-6397.
29. Zhuang, Z.; Xue, X.; Lin, Z., Self-assembly of SnO<sub>2</sub> quantum dots into hierarchically ordered structures assisted by oriented attachment. *Phys Chem Chem Phys* **2015**, *17*, 4845-8.
30. Gehrke, N.; Cölfen, H.; Pinna, N.; Antonietti, M.; Nassif, N., Superstructures of Calcium Carbonate Crystals by Oriented Attachment. *Cryst Growth Des* **2005**, *5*, 1317-1319.
31. Takasaki, M.; Kezuka, Y.; Tajika, M.; Oaki, Y.; Imai, H., Evolution of Calcite Nanocrystals through Oriented Attachment and Fragmentation: Multistep Pathway Involving Bottom-Up and Break-Down Stages. *ACS Omega* **2017**, *2*, 8997-9001.
32. Zhu, Y.; Zhao, W.; Chen, H.; Shi, J., A Simple One-Pot Self-Assembly Route to Nanoporous and Monodispersed Fe<sub>3</sub>O<sub>4</sub> Particles with Oriented Attachment Structure and Magnetic Property. *The Journal of Physical Chemistry C* **2007**, *111*, 5281-5285.

33. Chen, J. S.; Zhu, T.; Li, C. M.; Lou, X. W., Building hematite nanostructures by oriented attachment. *Angew Chem Int Ed Engl* **2011**, *50*, 650-3.
34. Ma, J.; Chen, K., Silica-free hydrothermal synthesis of  $\epsilon$ -Fe<sub>2</sub>O<sub>3</sub> nanoparticles and their oriented attachment to nanoflakes with unique magnetism evolution. *Ceramics International* **2018**, *44*, 19338-19344.
35. Guldenpfennig, A.; Distaso, M.; Klupp Taylor, R. N.; Peukert, W., Modelling the two-dimensional growth and oriented attachment of goethite nanorods synthesized via oxidation of aqueous ferrous hydroxide slurries. *Chemical Engineering Journal* **2018**, *347*, 798-807.
36. Liu, Y.; Wang, D.; Peng, Q.; Chu, D.; Liu, X.; Li, Y., Directly assembling ligand-free ZnO nanocrystals into three-dimensional mesoporous structures by oriented attachment. *Inorg Chem* **2011**, *50*, 5841-7.
37. Zhang, X. L.; Zhang, J. D.; Phuyal, D.; Du, J.; Tian, L.; Oberg, V. A.; Johansson, M. B.; Cappel, U. B.; Karis, O.; Liu, J. H.; Rensmo, H.; Boschloo, G.; Johansson, E. M. J., Inorganic CsPbI<sub>3</sub> Perovskite Coating on PbS Quantum Dot for Highly Efficient and Stable Infrared Light Converting Solar Cells. *Advanced Energy Materials* **2018**, *8*.
38. Zhang, X.; Shen, Z.; Liu, J.; Kerisit, S. N.; Bowden, M. E.; Sushko, M. L.; De Yoreo, J. J.; Rosso, K. M., Direction-specific interaction forces underlying zinc oxide crystal growth by oriented attachment. *Nat Commun* **2017**, *8*, 835.
39. Yasui, K.; Kato, K., Oriented Attachment of Cubic or Spherical BaTiO<sub>3</sub> Nanocrystals by van der Waals Torque. *The Journal of Physical Chemistry C* **2015**, *119*, 24597-24605.
40. Ning, J.; Zhang, D.; Song, H.; Chen, X.; Zhou, J., Branched carbon-encapsulated MnS core/shell nanochains prepared via oriented attachment for lithium-ion storage. *Journal of Materials Chemistry A* **2016**, *4*, 12098-12105.
41. Yuan, Y.; Wood, S. M.; He, K.; Yao, W.; Tompsett, D.; Lu, J.; Nie, A.; Islam, M. S.; Shahbazian-Yassar, R., Atomistic Insights into the Oriented Attachment of Tunnel-Based Oxide Nanostructures. *ACS Nano* **2016**, *10*, 539-48.
42. Liang, X.; Zhao, Z.; Zhu, M.; Liu, F.; Wang, L.; Yin, H.; Qiu, G.; Cao, F.; Liu, X.; Feng, X., Self-assembly of birnessite nanoflowers by staged three-dimensional oriented attachment. *Environmental Science: Nano* **2017**, *4*, 1656-1669.
43. Xiao, Y.; Zhao, X.; Jin, Q.; Su, D.; Wang, X.; Wu, S.; Zhou, L.; Fang, S., 3D hierarchical porous cobalt monoxide nanoplates with a book-like structure derived from Co(CO<sub>3</sub>)<sub>0.5</sub>(OH)·0.11H<sub>2</sub>O: two-steps oriented attachment and high-performance asymmetric supercapacitors. *Materials Research Express* **2017**, *4*.
44. Zhou, J.; Zhu, M.; Meng, R.; Qin, H.; Peng, X., Ideal CdSe/CdS Core/Shell Nanocrystals Enabled by Entropic Ligands and Their Core Size-, Shell Thickness-, and Ligand-Dependent Photoluminescence Properties. *J Am Chem Soc* **2017**, *139*, 16556-16567.
45. Zhu, C.; Liang, S.; Song, E.; Zhou, Y.; Wang, W.; Shan, F.; Shi, Y.; Hao, C.; Yin, K.; Zhang, T.; Liu, J.; Zheng, H.; Sun, L., In-situ liquid cell transmission electron microscopy investigation on oriented attachment of gold nanoparticles. *Nat Commun* **2018**, *9*, 421.
46. Templeman, T.; Sengupta, S.; Maman, N.; Bar-Or, E.; Shandalov, M.; Ezersky, V.; Yahel, E.; Sarusi, G.; Visoly-Fisher, I.; Golan, Y., Oriented Attachment: A Path to Columnar Morphology in Chemical Bath Deposited PbSe Thin Films. *Cryst Growth Des* **2018**, *18*, 1227-1235.
47. Cho, K. S.; Talapin, D. V.; Gaschler, W.; Murray, C. B., Designing PbSe nanowires and nanorings through oriented attachment of nanoparticles. *J Am Chem Soc* **2005**, *127*, 7140-7147.
48. Koh, W. K.; Bartnik, A. C.; Wise, F. W.; Murray, C. B., Synthesis of monodisperse PbSe nanorods: a case for oriented attachment. *J Am Chem Soc* **2010**, *132*, 3909-13.

49. Schliehe, C.; Juarez, B. H.; Pelletier, M.; Jander, S.; Greshnykh, D.; Nagel, M.; Meyer, A.; Foerster, S.; Kornowski, A.; Klinke, C.; Weller, H., Ultrathin PbS sheets by two-dimensional oriented attachment. *Science* **2010**, *329*, 550-3.
50. Nakagawa, Y.; Kageyama, H.; Oaki, Y.; Imai, H., Formation of Monocrystalline 1D and 2D Architectures via Epitaxial Attachment: Bottom-Up Routes through Surfactant-Mediated Arrays of Oriented Nanocrystals. *Langmuir* **2015**, *31*, 6197-201.
51. Yu, J. H.; Joo, J.; Park, H. M.; Baik, S. I.; Kim, Y. W.; Kim, S. C.; Hyeon, T., Synthesis of quantum-sized cubic ZnS nanorods by the oriented attachment mechanism. *J Am Chem Soc* **2005**, *127*, 5662-70.
52. Pradhan, N.; Xu, H.; Peng, X., Colloidal CdSe quantum wires by oriented attachment. *Nano Lett* **2006**, *6*, 720-4.
53. Halder, A.; Ravishankar, N., Ultrafine Single-Crystalline Gold Nanowire Arrays by Oriented Attachment. *Advanced Materials* **2007**, *19*, 1854-1858.
